# Supplementary material for: Exhaled Biomarkers in Idiopathic Pulmonary Fibrosis—A Six-Month Follow-up Study in Patients Treated with Pirfenidone
Source: MDPI journal article supplement (doi:10.3390/jcm9082523), 2020-08-05
Supplement: s1 [file s1]

**Table S1.** Clinical data of patients with IPF with exhaled breath condensate IL-6 concentration decrease and increase following six months of treatment with pirfenidone.

|                                        |             | Lower EBC IL-6 at 6 Months* | Higher EBC IL-6 at 6 Months* | <i>p</i> |
|----------------------------------------|-------------|-----------------------------|------------------------------|----------|
|                                        |             | N = 10                      | N = 8                        |          |
| Male gender                            |             | 10 (100%)                   | 6 (75%)                      | 0.094    |
| Age (years)                            |             | 71.5 (69–79)                | 76.5 (69.5–77.5)             | 0.562    |
| Months since IPF diagnosis             |             | 17 (13–55)                  | 33.5 (15.5–51.5)             | 0.756    |
| Months since first symptoms            |             | 27 (12–60)                  | 16 (6–59.5)                  | 0.657    |
| GAP score (points)                     |             | 3.5 (2–5)                   | 4 (3–4)                      | 0.722    |
| GAP stage I/II/III (number)            |             | 4/6/0                       | 3/5/0                        | 0.914    |
| BMI (kg/m <sup>2</sup> )               | baseline    | 27.65 (26.2–29.5)           | 28.88 (28.15–29.85)          | 0.307    |
|                                        | at 6 months | 26.8 (23.4–28.7)            | 26.7 (22.9–29.9)             | 0.986    |
| <b>Lung function</b>                   |             |                             |                              |          |
| FVC (% of predicted)                   | baseline    | 83.8 (67.2–102.5)           | 77.8 (63.7–96)               | 0.775    |
|                                        | at 6 months | 82.5 (71.6–106.3)           | 80.2 (62.2–100)              | 0.749    |
| $\Delta$ FVC (% of predicted)          |             | 2.85 (1.3–5)                | 2.15 (–1.45 – 3.45)          | 0.505    |
| TLC (% of predicted)                   | baseline    | 84.85 (78.2–91.2)           | 70.2 (65–72.2)               | 0.140    |
|                                        | at 6 months | 70.6 (67.9–81.3)            | 77.95 (70.3–81.6)            | 0.464    |
| $\Delta$ TLC (% of predicted)          |             | –6.5 (–13.4 – –3)           | 4.7 (–0.1–9)                 | 0.005    |
| TLCO (% of predicted)                  | baseline    | 48.3 (36.7–70.5)            | 57.8 (40–76.2)               | 0.599    |
|                                        | at 6 months | 48.7 (35.6–63.6)            | 50.8 (39.2–73.2)             | 0.815    |
| $\Delta$ TLCO (% of predicted)         |             | –1.1 (–5.3–3.15)            | –0.9 (–3–3.5)                | 0.569    |
| 6 MWD (meters)                         | baseline    | 520 (485–545)               | 435 (420–505)                | 0.219    |
|                                        | at 6 months | 482.5 (437.5–530)           | 480 (430–540)                | 0.837    |
| $\Delta$ MWD (meters)                  |             | –7.5 (–60–5)                | 12.5 (–15–45)                | 0.267    |
| $\Delta$ SpO <sub>2</sub> in 6 MWT (%) | baseline    | 8.5 (6.5–10.5)              | 8 (5–16)                     | 0.443    |
|                                        | at 6 months | 9 (6.5–11.5)                | 8.5 (7–14)                   | 0.535    |

\*Compared to EBC concentration at baseline. Data are presented as median and interquartile range or number and percentage. Abbreviations: IPF – idiopathic pulmonary fibrosis, GAP – gender, age, physiology prognostic index for IPF, BMI – body mass index, , FVC – forced vital capacity, TLC – total lung capacity, TLCO – lung transfer factor for carbon monoxide, 6 MWD – 6-minute walk distance,  $\Delta$ SpO<sub>2</sub> in 6 MWT – the difference between blood oxygenation at baseline and at peak exercise in the 6-minute walk test.

**Table S2.** Clinical data of patients with IPF with exhaled breath condensate VEGF-A concentration decrease and increase following six months of treatment with pirfenidone.

|                                 |             | Lower EBC VEGF-A at 6 Months* | Higher EBC VEGF-A at 6 Months* | P     |
|---------------------------------|-------------|-------------------------------|--------------------------------|-------|
|                                 |             | N = 9                         | N = 8                          |       |
| Male gender                     |             | 8 (89%)                       | 8 (100%)                       | 1.000 |
| Age (years)                     |             | 71 (69–79)                    | 76 (70–77)                     | 0.555 |
| Months since IPF diagnosis      |             | 16 (13–55)                    | 30 (17–39)                     | 0.596 |
| Months since first symptoms     |             | 24 (12–36)                    | 23 (12–66)                     | 0.825 |
| GAP score (points)              |             | 4 (2–5)                       | 4 (3–4)                        | 0.964 |
| GAP stage I/II/III (number)     |             | 3/6/0                         | 4/5/0                          | 0.629 |
| BMI (kg/m <sup>2</sup> )        | baseline    | 27.3 (26.2–28.2)              | 29 (28.4–30)                   | 0.077 |
|                                 | at 6 months | 26 (22.2–27.3)                | 29.01 (26.11–30.25)            | 0.048 |
| Lung function                   |             |                               |                                |       |
| FVC (% of predicted)            | baseline    | 77.5 (67.2–87.7)              | 83.8 (74.4–108.2)              | 0.529 |
|                                 | at 6 months | 82.5 (68.5–84.4)              | 85.4 (75–113.5)                | 0.565 |
| Δ FVC (% of predicted)          |             | 2.85 (1.3–5)                  | 2.8 (1.3–3.8)                  | 0.789 |
| TLC (% of predicted)            | baseline    | 84.5 (73.6–87.8)              | 72.2 (65–94.5)                 | 0.525 |
|                                 | at 6 months | 70.85 (66.7–79)               | 79.2 (70.3–92.1)               | 0.257 |
| Δ TLC (% of predicted)          |             | –6.15 (–3.4 – –3)             | –1.9 (–2.4 – –1.7)             | 0.206 |
| TLCO (% of predicted)           | baseline    | 43.3 (36.35–65.85)            | 61.65 (50.05–73.35)            | 0.217 |
|                                 | at 6 months | 44.45 (35.45–68.4)            | 52.2 (43.95–67.95)             | 0.827 |
| Δ TLCO (% of predicted)         |             | –0.8 (–2.8–5.9)               | –1 (–4.2–0.4)                  | 0.779 |
| 6 MWD (meters)                  | baseline    | 485 (420–550)                 | 480 (427.5–530)                | 0.837 |
|                                 | at 6 months | 505 (390–555)                 | 460 (450–540)                  | 0.702 |
| Δ MWD (meters)                  |             | 0 (–20–5)                     | 10 (–60–35)                    | 0.724 |
| Δ SpO <sub>2</sub> in 6 MWT (%) | baseline    | 9 (5–13)                      | 8 (6–11)                       | 0.742 |
|                                 | at 6 months | 10 (7–13)                     | 7 (3–10)                       | 0.188 |

\*Compared to EBC concentration at baseline. Data are presented as median and interquartile range or number and percentage. Abbreviations: IPF – idiopathic pulmonary fibrosis, GAP – gender, age, physiology prognostic index for IPF, BMI – body mass index, , FVC – forced vital capacity, TLC – total lung capacity, TLCO – lung transfer factor for carbon monoxide, 6 MWD – 6-minute walk distance, Δ SpO<sub>2</sub> in 6 MWT – the difference between blood oxygenation at baseline and at peak exercise in the 6-minute walk test.

**Table S3.** Comparison of clinical data of patients with IPF who demonstrated simultaneous IL–6 and VEGF–A increase and those who showed simultaneous IL–6 and VEGF–A decrease in EBC following six months of treatment with pirfenidone.

|                                 |             | Increase of Both EBC IL–6<br>and VEGF After 6 Months* | Decrease of Both EBC IL–6 and VEGF<br>After 6 Months* | <i>p</i> |
|---------------------------------|-------------|-------------------------------------------------------|-------------------------------------------------------|----------|
|                                 |             | N = 7                                                 | N = 9                                                 |          |
| Male gender                     |             | 6 (86%)                                               | 8 (89%)                                               | 0.987    |
| Age (years)                     |             | 77 (68–78)                                            | 71 (69–79)                                            | 0.791    |
| Months since IPF diagnosis      |             | 30 (10–39)                                            | 16 (13–55)                                            | 0.916    |
| Months since first symptoms     |             | 14 (0–66)                                             | 24 (12–36)                                            | 0.657    |
| GAP score (points)              |             | 4 (3–4)                                               | 4 (2–5)                                               | 1.0      |
| GAP stage I/II/III (number)     |             | 3/4/0                                                 | 3/6/0                                                 | 0.966    |
| BMI (kg/m <sup>2</sup> )        | baseline    | 29 (28.1–30)                                          | 27.3 (26.2–28.2)                                      | 0.129    |
|                                 | at 6 months | 28 (25.5–29.9)                                        | 26 (22.2–27.3)                                        | 0.154    |
| Lung function                   |             |                                                       |                                                       |          |
| FVC (% of predicted)            | baseline    | 81.2 (56.6–108.2)                                     | 77.5 (67.2–87.7)                                      | 0.773    |
|                                 | at 6 months | 85.4 (58.2–113.5)                                     | 82.5 (68.5–84.4)                                      | 0.745    |
| Δ FVC (% of predicted)          |             | 2.7 (0.6–4.2)                                         | 2.8 (1.3–3.8)                                         | 0.918    |
| TLC (% of predicted)            | baseline    | 71.35 (65–72.2)                                       | 84.5 (73.6–87.7)                                      | 0.367    |
|                                 | at 6 months | 79.2 (70.3–81.6)                                      | 70.85 (66.7–79)                                       | 0.334    |
| Δ TLC (% of predicted)          |             | 4.7 (–1.9–10.25)                                      | –6.15 (–13.4–3)                                       | 0.130    |
| TLCO (% of predicted)           | baseline    | 61.65 (51.8–76.2)                                     | 43.3 (36.35–65.85)                                    | 0.250    |
|                                 | at 6 months | 52.2 (39.2–73.2)                                      | 44.45 (35.45–68.4)                                    | 0.926    |
| Δ TLCO (% of predicted)         |             | –1 (–3– –0.8)                                         | –0.8 (–2.8–5.9)                                       | 0.808    |
| 6 MWD (meters)                  | baseline    | 445 (420–505)                                         | 485 (420–550)                                         | 0.584    |
|                                 | at 6 months | 510 (450–540)                                         | 505 (390–555)                                         | 0.560    |
| Δ MWD (meters)                  |             | 15 (0–55)                                             | 0 (–20–5)                                             | 0.204    |
| Δ SpO <sub>2</sub> in 6 MWT (%) | baseline    | 7.5 (5–11)                                            | 9 (5–13)                                              | 0.712    |
|                                 | at 6 months | 7 (7–10)                                              | 10 (7–13)                                             | 0.313    |

\*Compared to EBC concentration at baseline. Data are presented as median and interquartile range or number and percentage. Abbreviations: IPF – idiopathic pulmonary fibrosis, GAP – gender, age, physiology prognostic index for IPF, BMI – body mass index, , FVC – forced vital capacity, TLC – total lung capacity, TLCO – lung transfer factor for carbon monoxide, 6 MWD – 6-minute walk distance, ΔSpO<sub>2</sub> in 6 MWT – the difference between blood oxygenation at baseline and at peak exercise in the 6-minute walk test.
